# Supplementary material for: S-layer associated proteins contribute to the adhesive and immunomodulatory properties of Lactobacillus acidophilus NCFM
Source: PubMed Central journal article supplement (PMC7425073; doi:10.1186/s12866-020-01908-2), 2020-08-12

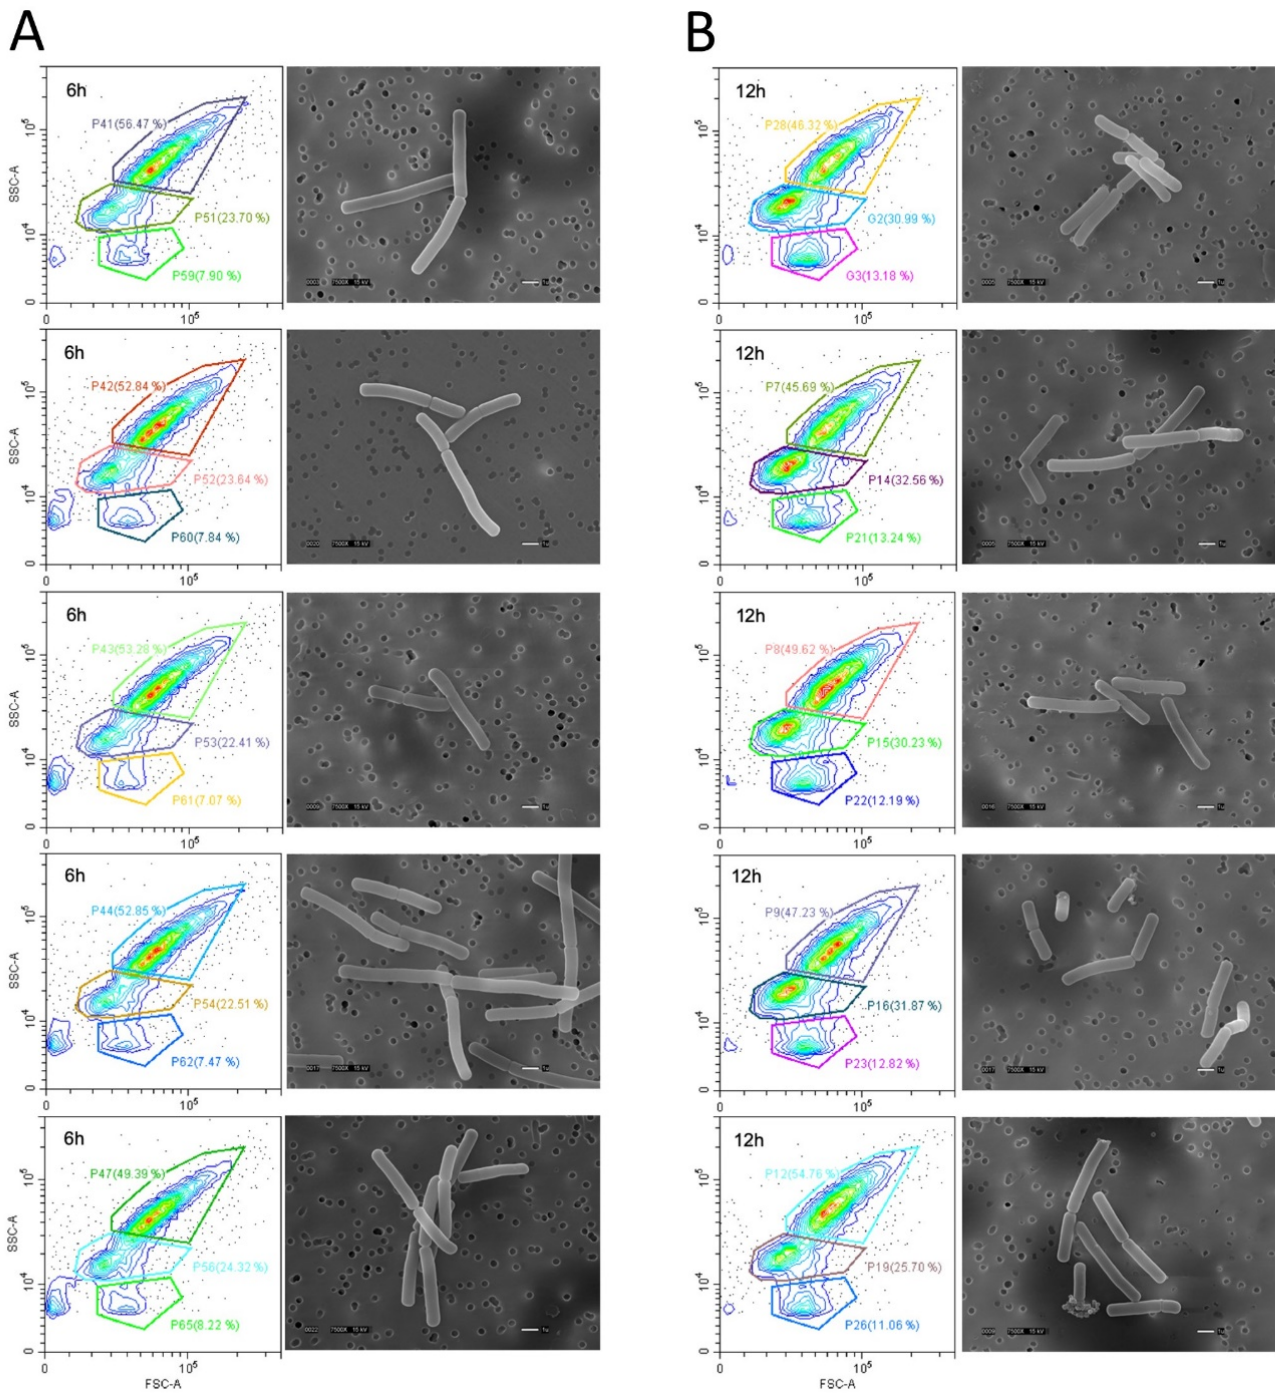

Supplement: 12866_2020_1908_MOESM2_ESM.pdf [file 12866_2020_1908_MOESM2_ESM.pdf]
